# Supplementary material for: Plastome Evolution in Hemiparasitic Mistletoes
Source: PubMed Central journal article supplement (PMC4607522; doi:10.1093/gbe/evv165), 2015-08-29
Supplement: supp_evv165_Supplementary_material.pdf [file supp_evv165_Supplementary_material.pdf]

**Table S1.** GenBank accession numbers of dicots with complete plastome sequences used for RELAX analyses.

| GenBank acc. | Taxon                        |
|--------------|------------------------------|
| NC_008796*   | <i>Ranunculus macranthus</i> |
| NC_009599*   | <i>Buxus microphylla</i>     |
| NC_026839    | <i>Lonicera japonica</i>     |
| NC_024663*   | <i>Camellia reticulata</i>   |
| NC_023790*   | <i>Vitis rotundifolia</i>    |
| NC_023112    | <i>Helianthus tuberosus</i>  |
| NC_023092*   | <i>Liquidambra formosana</i> |
| NC_022810    | <i>Aralia undulata</i>       |
| NC_020098    | <i>Tectona grandis</i>       |
| NC_016068*   | <i>Nicotiana undulata</i>    |
| NC_010776    | <i>Fagopyrum esculentum</i>  |
| NC_008535*   | <i>Coffea arabica</i>        |
| NC_008359*   | <i>Morus indica</i>          |
| NC_008115*   | <i>Eucalyptus globulus</i>   |

\*) Sequences used for RELAX analyses of inverted repeat genes.

**Table S2.** Length in base pairs (bp) of intergenic regions shared by *Vitis* and four species of Santalales.

|                    | <i>Vitis</i> | <i>Osyris</i> | <i>V. album</i> | <i>V. minimum</i> | <i>V. crassulae</i> |
|--------------------|--------------|---------------|-----------------|-------------------|---------------------|
| <i>trnH-psbA</i>   | 334          | 324           | 211             | 227               | 211                 |
| <i>psbA-trnK</i>   | 249          | 238           | 183             | 207               | 195                 |
| <i>trnQ-psbK</i>   | 346          | 354           | 245             | 211               | 248                 |
| <i>psbK-psbI</i>   | 406          | 382           | 372             | 408               | 404                 |
| <i>psbI-trnS</i>   | 142          | 139           | 92              | 95                | 110                 |
| <i>trnR-atpA</i>   | 198          | 173           | 220             | 226               | 164                 |
| <i>atpA-atpF</i>   | 65           | 51            | 76              | 80                | 74                  |
| <i>atpF-atpH</i>   | 493          | 163           | 368             | 307               | 129                 |
| <i>atpH-atpI</i>   | 895          | 1075          | 624             | 614               | 587                 |
| <i>atpI-rps2</i>   | 213          | 189           | 159             | 155               | 139                 |
| <i>rps2-rpoC2</i>  | 218          | 170           | 244             | 243               | 209                 |
| <i>rpoC2-rpoC1</i> | 165          | 177           | 191             | 179               | 183                 |
| <i>rpoC1-rpoB</i>  | 31           | 26            | 26              | 26                | 26                  |
| <i>rpoB-trnC</i>   | 1084         | 836           | 454             | 445               | 467                 |
| <i>trnC-petN</i>   | 847          | 855           | 720             | 878               | 845                 |
| <i>petN-psbM</i>   | 1233         | 1146          | 412             | 419               | 423                 |
| <i>psbM-trnD</i>   | 1113         | 1170          | 409             | 501               | 404                 |
| <i>trnD-trnY</i>   | 445          | 426           | 459             | 414               | 401                 |
| <i>trnY-trnE</i>   | 54           | 59            | 64              | 62                | 68                  |
| <i>trnE-trnT</i>   | 921          | 802           | 524             | 601               | 582                 |
| <i>psbC-trnS</i>   | 246          | 226           | 228             | 233               | 228                 |
| <i>trnS-psbZ</i>   | 362          | 322           | 433             | 386               | 406                 |
| <i>psbZ-trnG</i>   | 627          | 232           | 213             | 229               | 216                 |
| <i>trnG-trnfM</i>  | 147          | 175           | 141             | 183               | 170                 |
| <i>trnfM-rps14</i> | 167          | 148           | 147             | 147               | 141                 |
| <i>rps14-psaB</i>  | 131          | 141           | 136             | 134               | 138                 |
| <i>psaB-psaA</i>   | 25           | 25            | 47              | 52                | 32                  |
| <i>psaA-ycf3</i>   | 737          | 616           | 645             | 451               | 403                 |
| <i>ycf3-trnS</i>   | 678          | 981           | 499             | 545               | 486                 |
| <i>trnS-rps4</i>   | 272          | 302           | 324             | 310               | 322                 |
| <i>rps4-trnT</i>   | 301          | 376           | 188             | 172               | 196                 |

|                    |      |      |      |      |     |
|--------------------|------|------|------|------|-----|
| <i>trnT-trnL</i>   | 975  | 479  | 570  | 637  | 562 |
| <i>trnL-trnF</i>   | 321  | 376  | 268  | 332  | 309 |
| <i>trnM-atpE</i>   | 235  | 213  | 278  | 273  | 267 |
| <i>atpB-rbcL</i>   | 779  | 695  | 664  | 625  | 636 |
| <i>rbcL-accD</i>   | 610  | 607  | 558  | 611  | 485 |
| <i>accD-psaI</i>   | 760  | 682  | 180  | 159  | 175 |
| <i>psaI-ycf4</i>   | 424  | 402  | 144  | 153  | 164 |
| <i>ycf4-cemA</i>   | 858  | 715  | 494  | 450  | 364 |
| <i>cemA-petA</i>   | 227  | 211  | 190  | 187  | 173 |
| <i>petA-psbJ</i>   | 1074 | 514  | 389  | 402  | 374 |
| <i>psbJ-psbL</i>   | 149  | 132  | 132  | 136  | 128 |
| <i>psbF-psbE</i>   | 9    | 9    | 11   | 17   | 11  |
| <i>psbE-petL</i>   | 1304 | 1241 | 861  | 883  | 769 |
| <i>petL-petG</i>   | 179  | 167  | 167  | 162  | 162 |
| <i>petG-trnW</i>   | 130  | 113  | 115  | 129  | 109 |
| <i>trnW-trnP</i>   | 167  | 185  | 231  | 176  | 164 |
| <i>trnP-psaJ</i>   | 383  | 377  | 367  | 351  | 304 |
| <i>rps18-rpl20</i> | 289  | 248  | 231  | 265  | 251 |
| <i>rpl20-rps12</i> | 789  | 777  | 800  | 793  | 759 |
| <i>rps12-clpP</i>  | 142  | 130  | 145  | 163  | 154 |
| <i>clpP-psbB</i>   | 443  | 417  | 1515 | 1538 | 514 |
| <i>psbB-psbT</i>   | 187  | 185  | 175  | 180  | 186 |
| <i>psbT-psbN</i>   | 52   | 65   | 52   | 66   | 74  |
| <i>psbN-psbH</i>   | 84   | 84   | 100  | 103  | 95  |
| <i>psbH-petB</i>   | 118  | 123  | 136  | 142  | 142 |
| <i>petB-petD</i>   | 188  | 190  | 169  | 181  | 202 |
| <i>petD-rpoA</i>   | 208  | 191  | 179  | 240  | 195 |
| <i>rpoA-rps11</i>  | 80   | 65   | 66   | 69   | 59  |
| <i>rps11-rpl36</i> | 115  | 129  | 188  | 131  | 152 |
| <i>rps8-rpl14</i>  | 169  | 142  | 136  | 132  | 136 |
| <i>rpl14-rpl16</i> | 125  | 121  | 105  | 138  | 132 |
| <i>rpl16-rps3</i>  | 170  | 164  | 290  | 204  | 205 |
| <i>rps19-rpl2</i>  | 69   | 111  | 55   | 115  | 55  |
| <i>rpl2-rpl23</i>  | 18   | 18   | 13   | 13   | 13  |

|                   |               |               |               |               |               |
|-------------------|---------------|---------------|---------------|---------------|---------------|
| <i>rpl23-trnM</i> | 165           | 165           | 180           | 166           | 166           |
| <i>trnM-ycf2</i>  | 88            | 88            | 88            | 88            | 67            |
| <i>ycf2-trnL</i>  | 1007          | 1032          | 433           | 441           | 441           |
| <i>rps7-rps12</i> | 53            | 59            | 57            | 59            | 60            |
| <i>rps12-trnV</i> | 1717          | 1822          | 1782          | 1817          | 1309          |
| <i>trnV-16S</i>   | 219           | 227           | 222           | 220           | 230           |
| <i>16S-trnI</i>   | 300           | 300           | 321           | 316           | 307           |
| <i>trnI-trnA</i>  | 63            | 64            | 62            | 61            | 62            |
| <i>trnA-23S</i>   | 157           | 161           | 148           | 148           | 144           |
| <i>23S-4.5S</i>   | 107           | 99            | 106           | 106           | 99            |
| <i>4.5S-5S</i>    | 216           | 224           | 215           | 237           | 217           |
| <i>trnR-trnN</i>  | 602           | 543           | 592           | 571           | 505           |
| <i>rpl32-trnL</i> | 1158          | 787           | 347           | 401           | 437           |
| <i>rps15-ycf1</i> | 302           | 391           | 133           | 124           | 123           |
| <i>ycf1-trnN</i>  | 321           | 308           | 251           | 274           | 236           |
| <b>TOTAL</b>      | <b>31,450</b> | <b>28,847</b> | <b>23,965</b> | <b>24,325</b> | <b>21,490</b> |
| <b>Reduction</b>  |               | <b>8%</b>     | <b>24%</b>    | <b>23%</b>    | <b>32%</b>    |

**Table S3.** Gene content of plastomes of four species of Santalales. X = gene present and considered functional;  $\psi$  = pseudogene or fragment of gene present; – = gene not present.

|                             | <i>Osyris</i> | <i>V. album</i> | <i>V. crassulae</i> | <i>V. minimum</i> |
|-----------------------------|---------------|-----------------|---------------------|-------------------|
| <u>Protein coding genes</u> |               |                 |                     |                   |
| <i>psaA</i>                 | X             | X               | X                   | X                 |
| <i>psaB</i>                 | X             | X               | X                   | X                 |
| <i>psaC</i>                 | X             | X               | X                   | X                 |
| <i>psaI</i>                 | X             | X               | X                   | X                 |
| <i>psaJ</i>                 | X             | X               | X                   | X                 |
| <i>ycf3</i>                 | X             | X               | X                   | X                 |
| <i>ycf4</i>                 | X             | X               | X                   | X                 |
| <i>psbA</i>                 | X             | X               | X                   | X                 |
| <i>psbB</i>                 | X             | X               | X                   | X                 |
| <i>psbC</i>                 | X             | X               | X                   | X                 |
| <i>psbD</i>                 | X             | X               | X                   | X                 |
| <i>psbE</i>                 | X             | X               | X                   | X                 |
| <i>psbF</i>                 | X             | X               | X                   | X                 |
| <i>psbH</i>                 | X             | X               | X                   | X                 |
| <i>psbI</i>                 | X             | X               | X                   | X                 |
| <i>psbJ</i>                 | X             | X               | X                   | X                 |
| <i>psbK</i>                 | X             | X               | X                   | X                 |
| <i>psbL</i>                 | X             | X               | X                   | X                 |
| <i>psbM</i>                 | X             | X               | X                   | X                 |
| <i>psbN</i>                 | X             | X               | X                   | X                 |
| <i>psbT</i>                 | X             | X               | X                   | X                 |
| <i>psbZ</i>                 | X             | X               | X                   | X                 |
| <i>petA</i>                 | X             | X               | X                   | X                 |
| <i>petB</i>                 | X             | X               | X                   | X                 |
| <i>petD</i>                 | X             | X               | X                   | X                 |
| <i>petG</i>                 | X             | X               | X                   | X                 |
| <i>petL</i>                 | X             | X               | X                   | X                 |
| <i>petN</i>                 | X             | X               | X                   | X                 |
| <i>ndhA</i>                 | $\psi$        | –               | –                   | –                 |
| <i>ndhB</i>                 | $\psi$        | $\psi$          | $\psi$              | $\psi$            |
| <i>ndhC</i>                 | $\psi$        | –               | –                   | –                 |
| <i>ndhD</i>                 | $\psi$        | –               | –                   | –                 |
| <i>ndhE</i>                 | $\psi$        | –               | –                   | –                 |
| <i>ndhF</i>                 | –             | –               | –                   | –                 |
| <i>ndhG</i>                 | $\psi$        | –               | –                   | –                 |
| <i>ndhH</i>                 | $\psi$        | –               | –                   | –                 |
| <i>ndhI</i>                 | –             | –               | –                   | –                 |
| <i>ndhJ</i>                 | –             | –               | –                   | –                 |
| <i>ndhK</i>                 | $\psi$        | –               | –                   | –                 |
| <i>rbcL</i>                 | X             | X               | X                   | X                 |
| <i>atpA</i>                 | X             | X               | X                   | X                 |

|              |   |   |   |   |
|--------------|---|---|---|---|
| <i>atpB</i>  | X | X | X | X |
| <i>atpE</i>  | X | X | X | X |
| <i>atpF</i>  | X | X | X | X |
| <i>atpH</i>  | X | X | X | X |
| <i>atpI</i>  | X | X | X | X |
| <i>rpoA</i>  | X | X | X | X |
| <i>rpoB</i>  | X | X | X | X |
| <i>rpoC1</i> | X | X | X | X |
| <i>rpoC2</i> | X | X | X | X |
| <i>matK</i>  | X | ψ | X | X |
| <i>rps2</i>  | X | X | X | X |
| <i>rps3</i>  | X | X | X | X |
| <i>rps4</i>  | X | X | X | X |
| <i>rps7</i>  | X | X | X | X |
| <i>rps8</i>  | X | X | X | X |
| <i>rps11</i> | X | X | X | X |
| <i>rps12</i> | X | X | X | X |
| <i>rps14</i> | X | X | X | X |
| <i>rps15</i> | X | X | X | X |
| <i>rps16</i> | X | X | X | X |
| <i>rps18</i> | X | X | X | X |
| <i>rps19</i> | X | X | X | X |
| <i>rpl2</i>  | X | X | X | X |
| <i>rpl14</i> | X | X | X | X |
| <i>rpl16</i> | X | X | X | X |
| <i>rpl20</i> | X | X | X | X |
| <i>rpl22</i> | X | X | X | X |
| <i>rpl23</i> | X | X | X | X |
| <i>rpl32</i> | X | X | X | X |
| <i>rpl33</i> | X | – | – | – |
| <i>rpl36</i> | X | X | X | X |
| <i>infA</i>  | ψ | – | – | – |
| <i>clpP</i>  | X | X | X | X |
| <i>accD</i>  | X | X | X | X |
| <i>ccsA</i>  | X | ψ | X | X |
| <i>cemA</i>  | X | X | X | X |
| <i>ycf1</i>  | X | X | X | X |
| <i>ycf2</i>  | X | X | X | X |

Ribosomal genes

|              |   |   |   |   |
|--------------|---|---|---|---|
| <i>rrn16</i> | X | X | X | X |
| <i>rrn23</i> | X | X | X | X |

|               |   |   |   |   |
|---------------|---|---|---|---|
| <i>rrn5</i>   | X | X | X | X |
| <i>rrn4.5</i> | X | X | X | X |

tRNA genes

|                  |   |   |   |   |
|------------------|---|---|---|---|
| <i>trnA-UGC</i>  | X | X | X | X |
| <i>trnC-GCA</i>  | X | X | X | X |
| <i>trnD-GUC</i>  | X | X | X | X |
| <i>trnE-UUC</i>  | X | X | X | X |
| <i>trnF-GAA</i>  | X | X | X | X |
| <i>trnG-GCC</i>  | X | X | X | X |
| <i>trnG-UCC</i>  | X | - | - | X |
| <i>trnH-GUG</i>  | X | X | X | X |
| <i>trnI-CAU</i>  | X | X | X | X |
| <i>trnI-GAU</i>  | X | X | X | X |
| <i>trnK-UUU</i>  | X | X | X | X |
| <i>trnL-CAA</i>  | X | X | X | X |
| <i>trnL-UAA</i>  | X | X | X | X |
| <i>trnL-UAG</i>  | X | X | X | X |
| <i>trnM-CAU</i>  | X | X | X | X |
| <i>trnfM-CAU</i> | X | X | X | X |
| <i>trnN-GUU</i>  | X | X | X | X |
| <i>trnP-UGG</i>  | X | X | X | X |
| <i>trnQ-UUG</i>  | X | X | X | X |
| <i>trnR-ACG</i>  | X | X | X | X |
| <i>trnR-UCU</i>  | X | X | X | X |
| <i>trnS-GCU</i>  | X | X | X | X |
| <i>trnS-GGA</i>  | X | X | X | X |
| <i>trnS-UGA</i>  | X | X | X | X |
| <i>trnT-GGU</i>  | X | X | X | X |
| <i>trnT-UGU</i>  | X | X | X | X |
| <i>trnV-GAC</i>  | X | X | X | X |
| <i>trnV-UAC</i>  | X | - | - | - |
| <i>trnW-CCA</i>  | X | X | X | X |
| <i>trnY-GUA</i>  | X | X | X | X |
